# Crystal Structure of an Integron Gene Cassette-Associated Protein from *Vibrio cholerae* Identifies a Cationic Drug-Binding Module

Chandrika N. Deshpande<sup>1</sup>, Stephen J. Harrop<sup>2,3</sup>, Yan Boucher<sup>4\*</sup>, Karl A. Hassan<sup>1</sup>, Rosa Di Leo<sup>5</sup>, Xiaohui Xu<sup>5</sup>, Hong Cui<sup>5</sup>, Alexei Savchenko<sup>5</sup>, Changsoo Chang<sup>5</sup>, Maurizio Labbate<sup>6</sup>, Ian T. Paulsen<sup>1</sup>, H. W. Stokes<sup>6</sup>, Paul M. G. Curmi<sup>2,3</sup>, Bridget C. Mabbutt<sup>1\*</sup>

**1** Department of Chemistry and Biomolecular Sciences, Macquarie University, Sydney, New South Wales, Australia, **2** School of Physics, University of New South Wales, Sydney, New South Wales, Australia, **3** St Vincent's Centre for Applied Medical Research, Sydney, New South Wales, Australia, **4** Department of Civil and Environmental Engineering, Massachusetts Institute of Technology, Cambridge, Massachusetts, United States of America, **5** Banting and Best Department of Medical Research, University of Toronto, Toronto, Ontario, Canada, **6** Institute for the Biotechnology of Infectious Diseases, University of Technology, Sydney, New South Wales, Australia

## Abstract

**Background:** The direct isolation of integron gene cassettes from cultivated and environmental microbial sources allows an assessment of the impact of the integron/gene cassette system on the emergence of new phenotypes, such as drug resistance or virulence. A structural approach is being exploited to investigate the modularity and function of novel integron gene cassettes.

**Methodology/Principal Findings:** We report the 1.8 Å crystal structure of **Cass2**, an integron-associated protein derived from an environmental *V. cholerae*. The structure defines a monomeric beta-barrel protein with a fold related to the effector-binding portion of AraC/XylS transcription activators. The closest homologs of **Cass2** are multi-drug binding proteins, such as BmrR. Consistent with this, a binding pocket made up of hydrophobic residues and a single glutamate side chain is evident in **Cass2**, occupied in the crystal form by polyethylene glycol. Fluorescence assays demonstrate that **Cass2** is capable of binding cationic drug compounds with submicromolar affinity. The **Cass2** module possesses a protein interaction surface proximal to its drug-binding cavity with features homologous to those seen in multi-domain transcriptional regulators.

**Conclusions/Significance:** Genetic analysis identifies **Cass2** to be representative of a larger family of independent effector-binding proteins associated with lateral gene transfer within *Vibrio* and closely-related species. We propose that the **Cass2** family not only has capacity to form functional transcription regulator complexes, but represents possible evolutionary precursors to multi-domain regulators associated with cationic drug compounds.

**Citation:** Deshpande CN, Harrop SJ, Boucher Y, Hassan KA, Leo RD, et al. (2011) Crystal Structure of an Integron Gene Cassette-Associated Protein from *Vibrio cholerae* Identifies a Cationic Drug-Binding Module. PLoS ONE 6(3): e16934. doi:10.1371/journal.pone.0016934

**Editor:** Hendrik W. van Veen, University of Cambridge, United Kingdom

**Received:** October 6, 2010; **Accepted:** January 5, 2011; **Published:** March 3, 2011

**Copyright:** © 2011 Deshpande et al. This is an open-access article distributed under the terms of the Creative Commons Attribution License, which permits unrestricted use, distribution, and reproduction in any medium, provided the original author and source are credited.

**Funding:** This work is funded by Australian NHMRC grant 488502 (<http://www.nhmrc.gov.au/>) and supported by National Institutes of Health Grant GM62414-0 and the Ontario Research and Development Challenge Fund. The funders had no role in study design, data collection and analysis, decision to publish, or preparation of the manuscript.

**Competing Interests:** The authors have declared that no competing interests exist.

\* E-mail: [bridget.mabbutt@mq.edu.au](mailto:bridget.mabbutt@mq.edu.au)

‡ Current address: Department of Biological Sciences, University of Alberta, Edmonton, Alberta, Canada

## Introduction

The *Vibrio* genus is ubiquitous and abundant throughout the aquatic environment. It is clear that lateral gene transfer (LGT) events play a major role in the evolution and adaptation of this organism, with genetic interchange of *Vibrio* genes observed over a wide range of phylogenetic distances [1]. Our analysis of *V. cholerae* and *V. vulnificus* genomes suggests up to 20% of their content to have arisen via this route. The continued emergence of novel pathogenic clones carrying diverse combinations of phenotypic and genotypic properties significantly hampers control of the disease [2]. The emergence of *V. cholerae* O139, one of the two strains responsible for epidemic Asiatic cholera, appears to be a

result of LGT from multiple and diverse descendants of the seventh pandemic O1 El Tor strain [2,3]. Recent studies have indicated that the O1 and O139 associated virulence genes (or their homologues) are also dispersed among environmental strains of *V. cholerae* [4,5]. LGT and acquisition of virulence genes is then a very likely mechanism for the emergence of pandemic strains of *V. cholerae* from non-pathogenic environmental strains [6,7,8,9]. The mobilization and integration of mobile gene clusters carrying genes for multiple antibiotic resistance, although not directly implicated in the mechanism of pathogenicity, are also thought to significantly influence the epidemiology of cholera [10].

One important mediator of LGT involves mobile gene cassettes clustered in association with integrons [11]. Gene cassettes are

captured by integrons via their intrinsic site-specific recombination system [12,13,14] and constitute the smallest known mobilisable genetic element [7,13,15]. Integrons themselves can be found on mobile elements as well as in the chromosome [7,15]. While most integron cassette arrays contain relatively small numbers of cassettes, extremely large arrays (numbering 100–200) appear particularly prevalent for *Vibrio* species [8,16]. Rearrangements and deletions/insertions of large portions of these mobile gene arrays appear to be common events [6,14], and arrays can display high levels of diversity even in strains that are otherwise closely related. Independent studies continue to show that gene cassettes possess a very high proportion of genetic novelty, whether derived from defined strains [8,16] or from metagenomic surveys [17,18].

In this work, we focus on one integron gene cassette (*Vch\_cass2*) isolated from a strain of *V. cholerae* resident within a brackish coastal environment in north-eastern USA. Initial sequencing identified the gene cassette to encode a domain with some homology to the AraC superfamily of transcription activators, generally implicated in the regulation of stress response and virulence [19]. These regulators are well characterized to be modular systems, and include the AraC, MarR and MerR protein families [20]. Generally, these are organized with a DNA-binding domain that acts as a positive regulator of transcription fused to an effector domain which provides a binding site for a specific chemical activator molecule [20,21]. The modularity of these systems provides capacity for complex regulatory networks, which can also incorporate the membrane transporters for extrusion of multiple toxic agents or drugs [22]. In this way, for example, the AraC and MerR multi-domain regulators are organised to be capable of recognizing the same array of toxic compounds extruded by the transporters they themselves transcribe [23].

Our recovery of a gene cassette encoding a single and independent effector-like domain is noteworthy as a likely evolutionary precursor to a transcription regulatory system within *Vibrio spp.* The structural and functional characterisation of this novel integron-associated protein, named here **Cass2**, was thus of immediate interest as a potential drug-binding factor, particularly as the integron/gene cassette system is strongly associated with the emergence of antibiotic and drug resistance [11]. We found the protein structure to be representative of several single-domain homologues, often mobile, within the genomes of related aquatic-dwelling bacterial species. The origin of the gene cassette within an environmental *Vibrio* species points to its potential as a mobile element facilitating the spread of drug resistance and the emergence of novel phenotypes.

## Results

### An Independent Effector-Binding Domain Related to the AraC\_E\_bind Superfamily

The gene cassette named *Vch\_cass2* was one of a group of integron gene cassettes isolated from OP4G, an environmental strain of *V. cholerae* derived from a brackish coastal pond in Massachusetts (USA). Partial genomic sequencing has established this strain to have strong sequence identity (>90%) with known pathogenic strains of *V. cholerae* (Boucher, unpublished). The encoded protein sequence, **Cass2**, displays signature motifs that associate it with the superfamily AraC\_E\_bind (cl01368, sm00871 [24], pfam06445), named for the effector domain of the AraC/XylS transcription activators [21]. Members of this superfamily regulate diverse bacterial functions, including sugar catabolism and responses to stress and virulence [19]. As outlined in Figure 1, several multi-domain protein families incorporate an effector domain of this type (usually C-terminal in position), often in

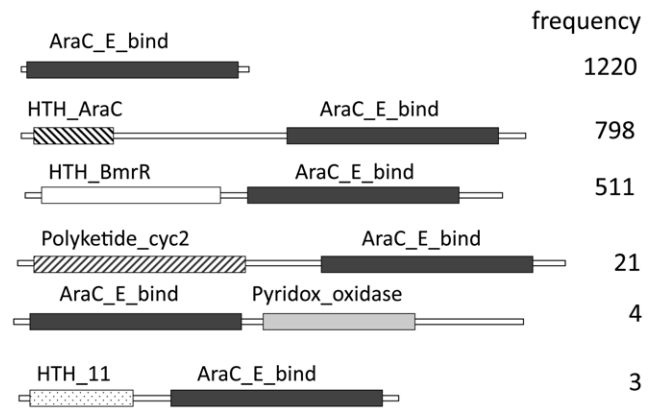

**Figure 1. Domain analysis of Cass2 sequence.** Six groupings are identified to contain AraC\_E\_bind (pfam06445) domains in a variety of architectures. The number of sequences found in each grouping (May, 2010) is indicated by frequency. doi:10.1371/journal.pone.0016934.g001

conjunction with a helix-turn-helix DNA-binding domain. This allows transcription activation of cognate promoters to be enabled through the highly conserved DNA-binding domain in response to effector binding [21,25]. However, in the case of *Vch\_cass2*, sequence searches (both gene and protein levels) established it to be representative of an entirely distinct family of independent single-domain proteins, represented by over 1200 homologs across a range of organisms. A phylogenetic analysis of these sequence relatives (Figure 2) places **Cass2** in a distinct clade (75–79% amino acid identity) sourced from a variety of marine-dwelling bacteria. While **Cass2** clearly clusters with homologs from specific *Vibrio spp.* (bootstrap value of 100%), a related but distinct clade displaying ~40% amino acid identity is evident within *Shewanella* genomes. Representative protein sequences for members of these two clades are aligned with that of **Cass2** in Figure 3.

Importantly, like *Vch\_cass2*, the genetic context for many of its homologs indicate an association with LGT. Those relatives displaying highest sequence homology are also encoded within gene cassette elements (e.g. *V. cholerae* MZO-2 and AM-19226), while others are found adjacent to transposon features (*V. vulnificus* CMCP6).

### Crystal Structure of Cass2

Structure determination by x-ray crystallography revealed the protein **Cass2** to be a monomer organised into a barrel-like form comprising an antiparallel  $\beta$ -sheet of eight strands (Figure 4a). Flanking the concave face of the central sheet are two separated helical elements, in which helices  $\alpha 1$  (residues 20–24) and  $\alpha 2$  (31–45) are aligned to one side, and helix  $\alpha 3$  (104–118) to the other. The topology of the domain highlights its pseudo two-fold symmetry, which is based on repeating  $\beta$ - $\beta$ - $\alpha$ - $\beta$  motifs. Subdomain I (residues 9–91) superimposes over subdomain II (residues 1–8, 92–149) with an rmsd of 1.7 Å (calculated on 37  $C_{\alpha}$  atoms), and directly aligns elements  $\beta 2$ ,  $\alpha 2$ ,  $\beta 3$  and  $\beta 4$  with  $\beta 6$ ,  $\alpha 3$ ,  $\beta 7$  and  $\beta 8$ , respectively. Despite the low sequence identity of the two subdomains (~12%), the structural superposition coherently maps side chains Phe14, Leu34, Trp35, Tyr56 and Val69 from subdomain I to those of Phe97, Leu110, Trp111, Tyr136 and Val142 in subdomain II. These recurring side chains stabilise packing of the helices to the  $\beta$ -sheet and form critical elements of the ligand-binding site.

Within both subdomains of **Cass2**, a relatively flexible loop is located C-terminal to the helical portion, i.e. forming connections

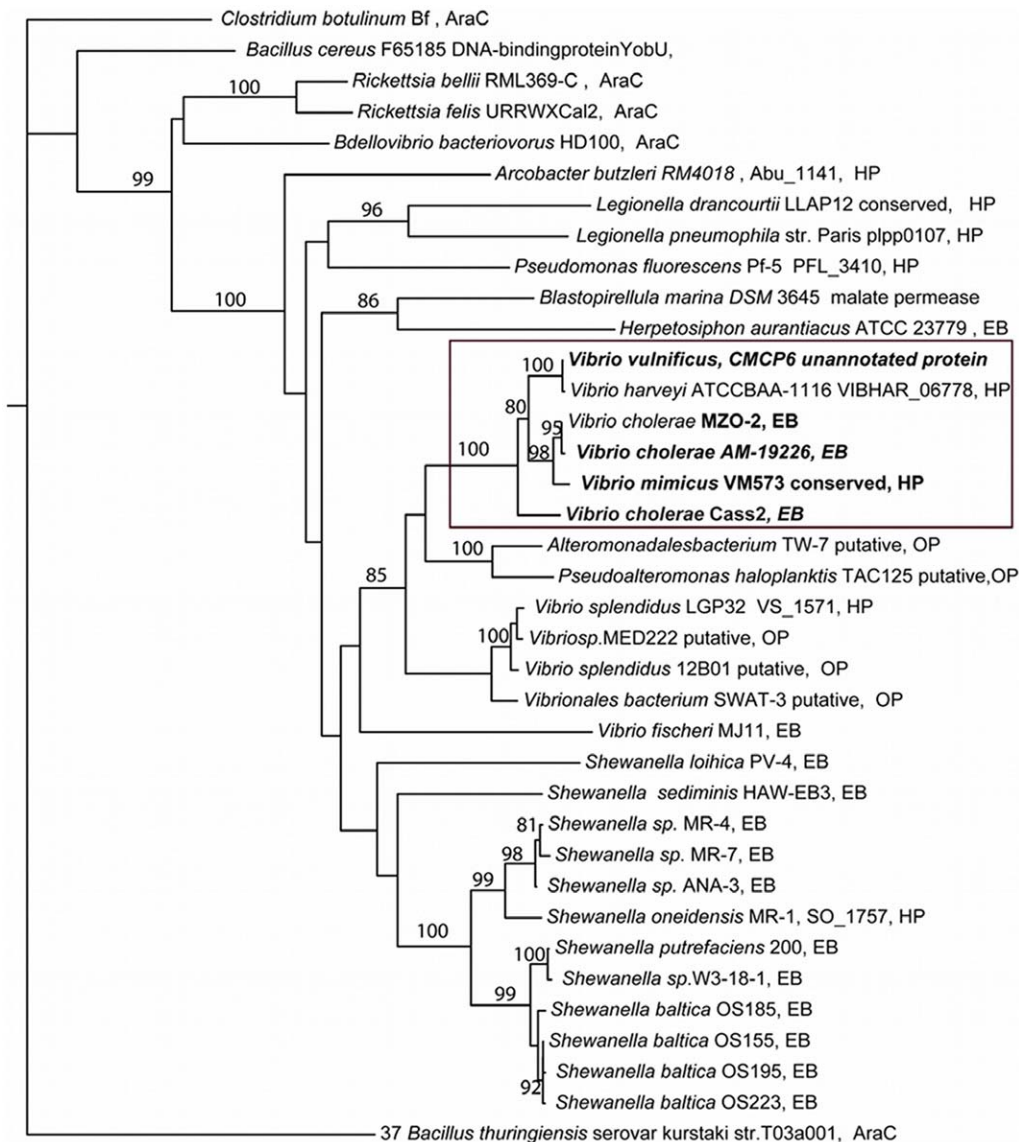

**Figure 2. Phylogenetic tree of Cass2 sequence with evolutionary distances.** Bootstrap values  $\geq 80\%$  are shown over the internodes for 36 sequence homologues. Protein names are annotated as in the NCBI database and distinguished as: EB, transcription activator, effector binding; AraC, transcription regulator, AraC family; HP, hypothetical protein or OP, orphan protein. Boxed clade contains sequence of interest; its relatives shown in bold are known to be gene cassettes from integron cassette arrays.  
doi:10.1371/journal.pone.0016934.g002

between  $\alpha 2$ - $\beta 3$  (residues 46–50) and  $\alpha 3$ - $\beta 7$  (residues 119–130) segments. These loops project from the top and bottom of the sheet, respectively (orientation as depicted in Figure 4). Additional areas of flexibility (as evidenced by elevated B-factors) reside within subdomain I, provided by the loops connecting sheet strands  $\beta 3$ - $\beta 4$  and  $\beta 4$ - $\beta 5$  of the structure.

The central cavity enclosed between the helices of **Cass2** is largely hydrophobic in nature, and aromatic side chains predominate. However, a single acidic group (Glu134, originating from strand  $\beta 7$ ) is buried deep within this cleft, flanking the pseudo two-fold axis of the protein structure. The polarity of this side chain is stabilised by hydrogen bonds to side chains of Tyr56, Tyr136, and Trp111 (Figure 4B). Between the helical edges of the cavity and directly above the topological switch-point of the sheet (i.e.  $\beta 3/\beta 7$ ), density is observed corresponding to a polyethylene

glycol (PEG) molecule captured during crystallization of **Cass2**. Hydrophobic side chains from helices  $\alpha 2$  (Trp35, Tyr39) and  $\alpha 3$  (Pro104, Val107, Ile108, Trp111) and the  $\beta 7/\beta 8$  interstrand loop (Tyr136) are within 4 Å of this ligand. Some additional density can be distinguished in our maps belonging to a second (non-definable) ligand, extending further along this same cavity to Trp115.

The sequence alignment for the two distinct clades of **Cass2** relatives from *Vibrio* and *Shewanella* (Figure 3) highlights that conserved sequence segments are distributed throughout the domain, most strongly within structural components making up the central cavity. All of the side chains listed above as interacting with bound PEG, as well as Glu134, are conserved across the **Cass2** sequence family (Tyr39 being conservatively replaced in *Shewanella* strains) (Figure 3). The domain we define here thus provides a common framework for a hydrophobic ligand chemistry.

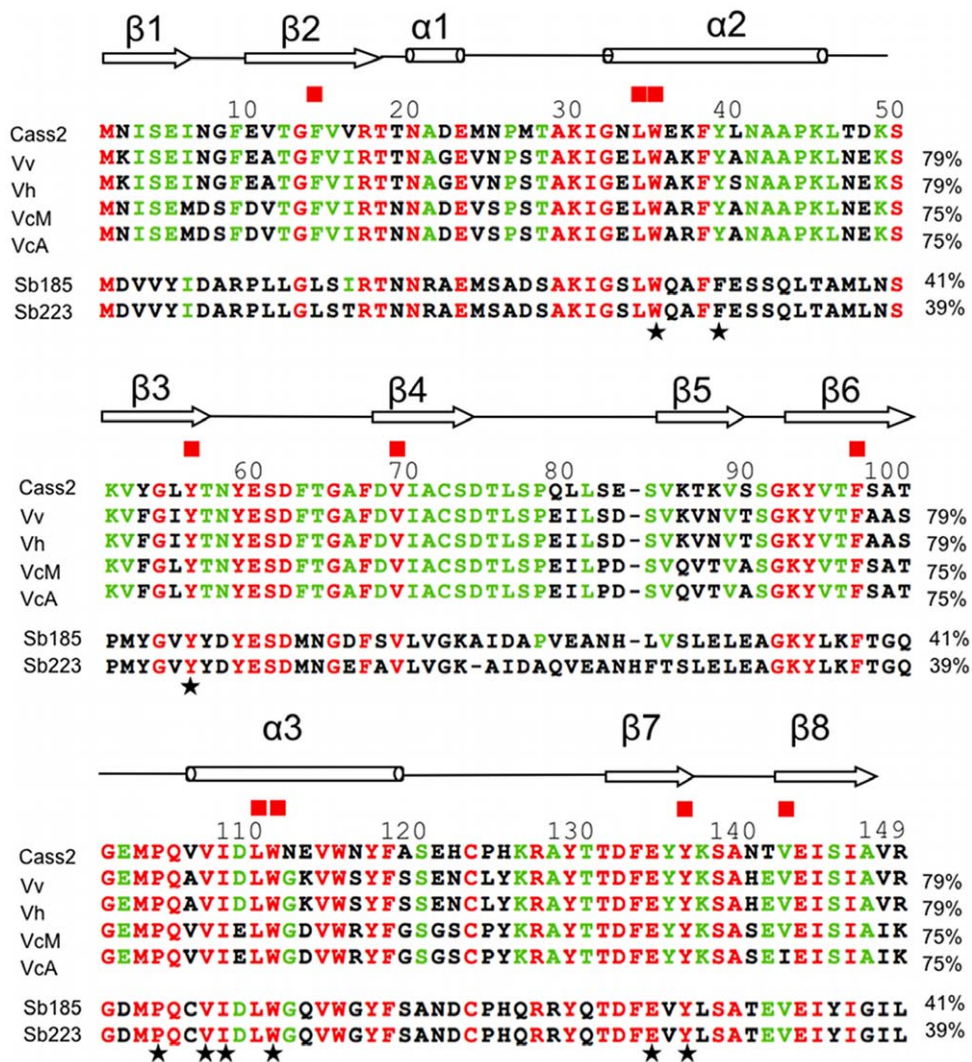

**Figure 3. Multiple alignment of Cass2 and sequence homologs.** Cass2 sequence is aligned with representative strains from *Vibrio*: Vv, *Vibrio vulnificus* CMCP6 (AE016795.2); Vh, *Vibrio harveyii* ATCC-BAA-1116 (YP\_001448888.1); VcM, *Vibrio cholerae* MZO-2 (ZP\_01980402.1); VcA, *Vibrio cholerae* AM-19226 (YP\_002176820.1). Representative sequences are also included from the related clade of *Shewanella* homologs: Sb185, *Shewanella baltica* OS185 (YP\_0013657); Sb223, *Shewanella baltica* OS223, (YP\_0023586). Secondary structure representation is as derived from crystal structure of **Cass2** (this work). Residues completely conserved in all homologs are shaded red, partially conserved residues are green. Active site residues are starred, residues conserved in both subdomains I and II are also indicated (filled square).

doi:10.1371/journal.pone.0016934.g003

### Structural Relationship to Effector-Binding Domains

Searches for structural homologues of Cass2 revealed several fold relatives with overlapping biological functions associated with transcription regulation. Close spatial alignment was found to putative transcription regulation protein from *Staphylococcus aureus* (PDB 3LUR), the C-terminal domain of Rob transcription factor from *E. coli* (PDB 1D5Y) [26], the C-terminal drug-binding domain of the multi-drug efflux transporter regulator BmrR from *Bacillus subtilis* (PDB 3D6Z) [27], and the gyrase inhibitory protein GyrI/Sbmc from *E. coli* (PDB 1JYH) [28]. Despite their highly diverse sequences (with only 15–26% identity to Cass2), these three structures overlay well with that of Cass2, with rmsd values of 1.9, 2.1, 2.5 and 2.4 Å, respectively. Some members of the BmrR subfamily, those of the MerR transcription activator systems [20], had already been detected as remote relatives of Cass2 within our initial sequence searches (outlined in Figure 1). The *E. coli* Rob and GyrI domains are also members of the AraC/

XylS family of transcription factors; Rob is known to control diverse regulons in prokaryotes [26] and GyrI plays a role in protecting cells against the ribosomally synthesized peptide antibiotic, microcin B17 [28]. Both GyrI and the C-terminal domain of Rob have been speculated to be ligand-binding domains, although the physiological ligands have not been identified.

Amongst these five structural relatives (overlaid in Figure 5), all display a similar disposition of secondary structure elements, the greatest variation occurring in the region corresponding to helices  $\alpha 2$  and  $\alpha 1$  of **Cass2**. A glutamate residue is preserved midway across the sheet in all the proteins, stabilised within a hydrophobic environment by surrounding Tyr side chains. The closest structural homolog from *Staphylococcus aureus* (PDB 3LUR), retains many of the hydrophobic side chains of the central cavity, but also possesses a cluster of polar residues (Cys, Gln and Met) not present in **Cass2** (Figure 5C).

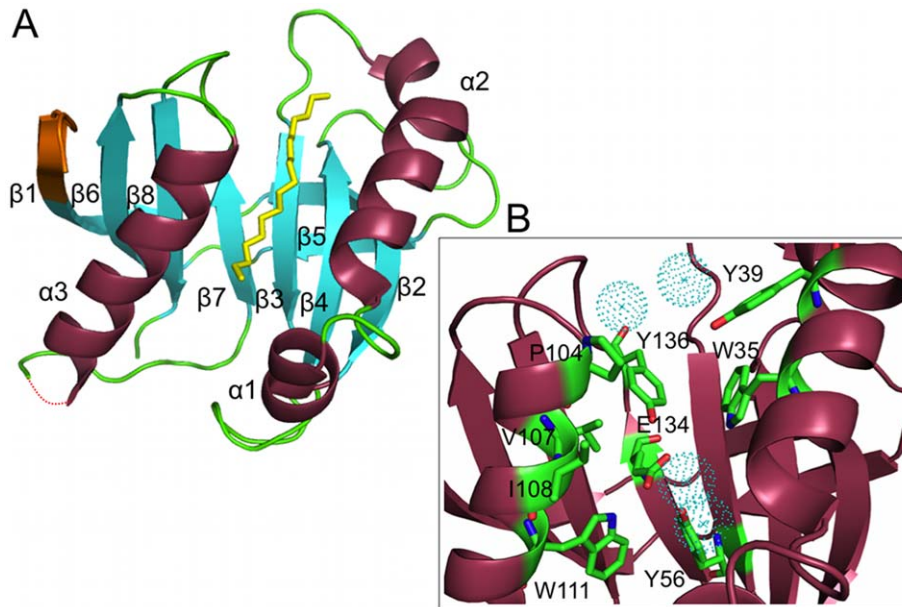

**Figure 4. Three-dimensional crystal structure of Cass2 at 1.8 Å.** A) Structure coloured by secondary structure elements: strands  $\beta 1$  (residues 1–6),  $\beta 2$  (9–18),  $\beta 3$  (52–57),  $\beta 4$  (67–73),  $\beta 5$  (85–89),  $\beta 6$  (92–100),  $\beta 7$  (131–135) and  $\beta 8$  (141–147) and helices  $\alpha 1$  (20–24),  $\alpha 2$  (31–45) and  $\alpha 3$  (105–118). A loop region of poor density connecting  $\alpha 3$  to  $\beta 7$  (residues 120–122) is represented by dotted line. A bound molecule of PEG (yellow) occupies the active site. N-terminal tag residues forming part of strand  $\beta 1$  are shaded orange. B) Depiction of side chains within 4 Å of the PEG molecule are depicted, including surrounding water molecules. Polarity of Glu134 is neutralised by polar groups of Tyr 56, Tyr136 and Trp111 side chains. doi:10.1371/journal.pone.0016934.g004

For BmrR, known to bind a diverse group of hydrophobic cationic compounds, several crystal structures of its complexes have been determined: those with rhodamine 6G [27], tetraphenylphosphonium (TPP) [29] and berberine [27]. In our structure of **Cass2**, the site occupied by PEG correlates closely with the location of the cationic drug-binding cavity of BmrR [27,29]. Within the BmrR-TPP complex [29], the phenyl ligand substituents are seen to stack with hydrophobic side chains which include Tyr51 (from strand  $\beta 3$ ) and Ile71 (strand  $\beta 4$ ). Nearby, the charged Glu134 residue is stabilized by hydrogen-bonding to the internal tyrosine side chains (Y33, Y68, Y110). Although not all cavity-forming residues of **Cass2** have directly conserved sequence locations in BmrR, a similar binding framework is common to both homologs, as depicted in Figure 5B.

The crystal structure of the **Cass2**-PEG complex displays a markedly distinct conformation in the region C-terminal to helix  $\alpha 2$ . Brennan's team have proposed that hinge opening of BmrR in the vicinity of helix  $\alpha 2$ , as well as repositioning of Tyr33 (corresponding to **Cass2** Tyr39), results in the exposure of the central cavity for interaction with the cationic ligand [29]. The loop segment following helix  $\alpha 2$  in **Cass2** appears to be relatively flexible in our structure, and it is thus feasible that access to the ligand site in the gene cassette domain might occur by a similar helix-opening mechanism, perhaps coupled in this case with expulsion of the interior side chain Tyr39.

### Ligand Binding Capacity of Cass2

Although the natural ligand of **Cass2** is unknown, it is clear that the domain contains a binding site suitable for hydrophobic/cationic compounds, compatible with that seen in its structural homologs. Tryptophan fluorescence was used to test for interactions of **Cass2** with a set of cationic compounds known to associate with the related bacterial transcription regulators: TPP, benzalkonium chloride, chlorhexidine [30]. The site-specific

mutant (**E134Q**)**Cass2**, designed to neutralise the electrostatic effects of Glu134, was additionally probed in these titrations. **Cass2** contains three tryptophan residues, two of which (Trp35, Trp111) are observed to be in close contact to PEG from helices  $\alpha 2$  and  $\alpha 3$  within the binding cleft. The third side chain (Trp115) is somewhat more remote along the ligand cavity; it exhibits multiple rotamer forms in the crystal, possibly due to accommodation of other ligand molecules.

Initial fluorescence measurements in the presence of excess quantities of all three compounds detected a blue shift (5 nm) from the emission maximum of **Cass2** in its apo form (349 nm). This is consistent with loss of solvent exposure of the Trp residues, such as might occur as the cavity closes upon ligand binding. For all three compounds at sub-micromolar concentrations, significant quenching (up to 60%) of the intrinsic fluorescence emission of **Cass2** was observed in a concentration-dependent manner, as illustrated for the titration with TPP in Figure 6. All interpolated  $K_D$  values were determined to be in the sub-micromolar range (Table 1). The monovalent compound benzalkonium chloride, smallest of the three compounds tested, displayed the strongest binding ( $K_D = 0.1 \mu\text{M}$ ). The binding affinity determined for TPP ( $K_D = 0.2 \mu\text{M}$ ) indicates a tighter interaction with **Cass2** than has been reported for the fold relative BmrR [27].

Mutation of the central glutamate sidechain of **Cass2** had little effect on its strength of binding to the monovalent compounds tested (TPP, benzalkonium chloride). For the divalent compound chlorhexidine, the affinity for the E134Q mutant appears to have been somewhat enhanced ( $K_D = 0.10 \mu\text{M}$ ). The electrostatic role of this glutamate thus appears to be tempered in the case of **Cass2**, presumably due to the large number of hydrophobic contacts within the internal binding cavity.

Our results are consistent with the earlier binding studies of BmrR to three cationic compounds (Table 1) and crystal structures obtained for the resulting complexes [27]. Substitution of the

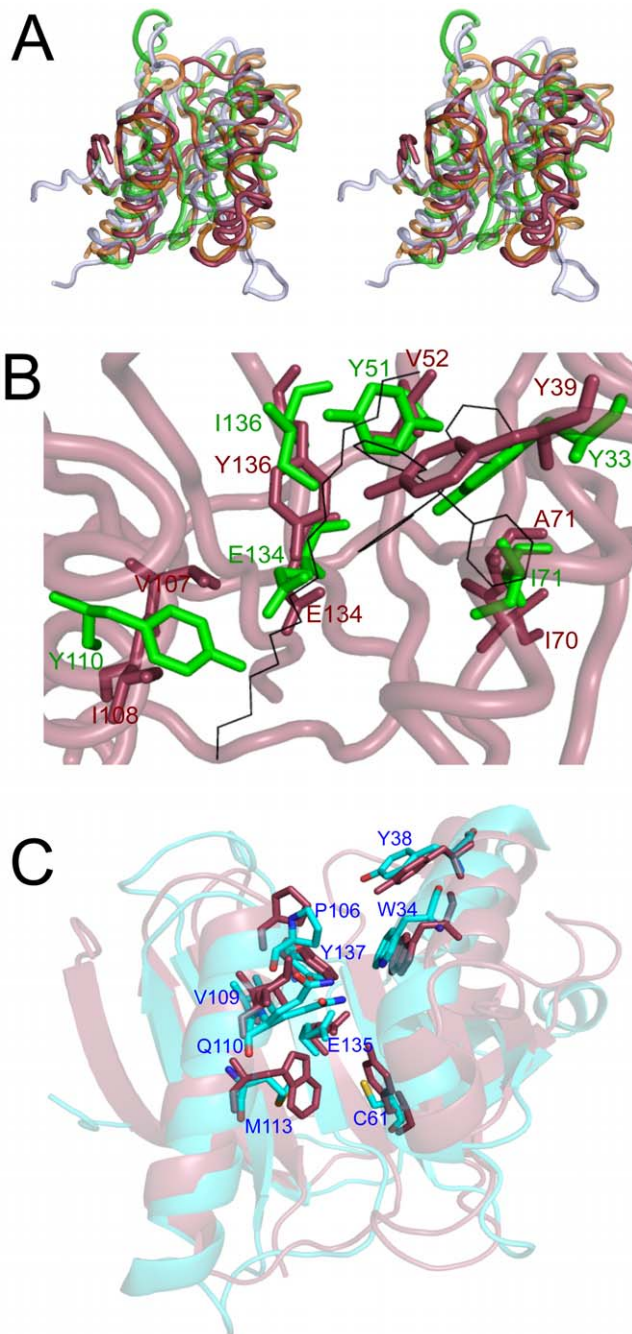

**Figure 5. Structural homologs of *Cass2*.** A) Stereo superposition (wall-eyed view) of *Cass2* crystal structure (red), C-terminal domain of Rob transcription factor, *E. coli* (purple, PDB 1D5Y) [26], gyrase inhibitory protein GyrI, *E. coli* (orange, PDB 1JYH) [28], C-terminal drug-binding domain of BmrR, *B. subtilis* (green, PDB 3D6Z) [27]. B) Overlay of active site of drug-bound BmrR (green, PDB 2BOW) on *Cass2* (red) identifies analogous positions of ligand binding residues. Bound TPP and PEG molecules depicted in black. Coordinates of sidechain Tyr33 of BmrR are separately taken from PDB 1R8E [66]. C) Overlay of putative transcription regulation protein from *Staphylococcus aureus* (cyan, PDB 3LUR) on *Cass2* (red) identifies altered chemistry of cavity residues.

doi:10.1371/journal.pone.0016934.g005

central glutamate residue of BmrR (alanine and glutamine variants) resulted in unpredictable binding affinities for TPP, berberine and rhodamine 6G. This led the Brennan group to

propose that the overriding enthalpic contributors to binding affinity are the Van der Waals and stacking interactions between protein and drug compound, rather than charge-charge interactions [27]. This is consistent with our observation of little alteration of tight binding of TPP to *Cass2* with loss of the glutamate charge.

Given we can demonstrate that *Cass2* successfully binds the same cationic compounds known to associate with transcriptional regulators, minimal inhibitory concentration (MIC) assays were undertaken to determine if the *Vch\_cass2* gene could directly confer resistance to *Vibrio* cells growing on media containing these compounds. Laboratory strains *Vch\_cass2+* and *Vch\_cass2* were prepared, but in the presence of all compounds, no difference in cell growth was observed for the two strains. The inability of *Vch\_cass2+* gene to directly confer resistance to cationic compounds points to the need for protein factors in addition to the effector domain to be present for effective regulation of their cellular metabolism.

### A Conserved Protein-Binding Interface

Two sequence segments of the *Cass2* sequence family not directly associated with the ligand-binding cleft stand out as strongly conserved. One encompasses the sequence motif -YESD- located from Tyr59 within the  $\beta 3/\beta 4$  loop. When mapped onto the three-dimensional fold of *Cass2*, these side chains, in addition to residues Phe63, Thr64 and Ala66, cluster along a projected surface feature well to the “base” of the binding cleft (depicted in Figure 7A). An additional conserved segment, -VWxYF- (from Val114 in *Cass2*), is the origin of exposed Trp and Phe side chains which elongate the same surface. The entire region is relatively flexible in the crystal structure, with high B-factors observed for the loop residues.

A possible role for this surface becomes evident when, for instance, the structure of *Cass2* is overlaid with that of the two-domain Rob transcription factor [26]. This highlights a remarkable preservation of molecular properties of this surface in both systems (Figure 7B). In the Rob protein, the site clearly forms the interface between the effector-binding (C-terminal) and DNA-binding (N-terminal) domains. Despite being a single module, *Cass2* retains some of the hydrophobic features of the interface, as well as possessing protruding charged side chains, including Arg149 (as its C-terminal residue). In the Rob structure, the analogous side chain at this location (Arg288) participates in an electrostatic interaction across to the neighbouring DNA-binding domain. Thus, *Cass2* gives every appearance of being suitably organised for interaction with a protein partner with features common to the helix-turn-helix domains utilised by its sequence relatives.

It should be noted that the organization of both *Cass2* and Rob differ completely from the situation found in the BmrR fold homolog, the interdomain interface of which is located on the opposite side of the effector-binding module [31]. The BmrR interaction interface entails the packing of the DNA-binding domain of each monomer against the drug-binding domain of its dimerisation partner [31]. Amongst the structural elements necessary for stabilizing this interaction, a 10-residue loop from the drug-binding domain intercalates helices  $\alpha 3'$  and  $\alpha 4'$  of the DNA-binding domain. The corresponding loop in *Cass2*, connecting strands  $\beta 7$  and  $\beta 8$ , is relatively short (136–140) and unlikely to participate in a similar interaction. The absence of a linker helix in *Cass2*, oriented on the same side as the domain interface and essential for dimerisation in BmrR, further rules out this region as a putative protein-binding interface.

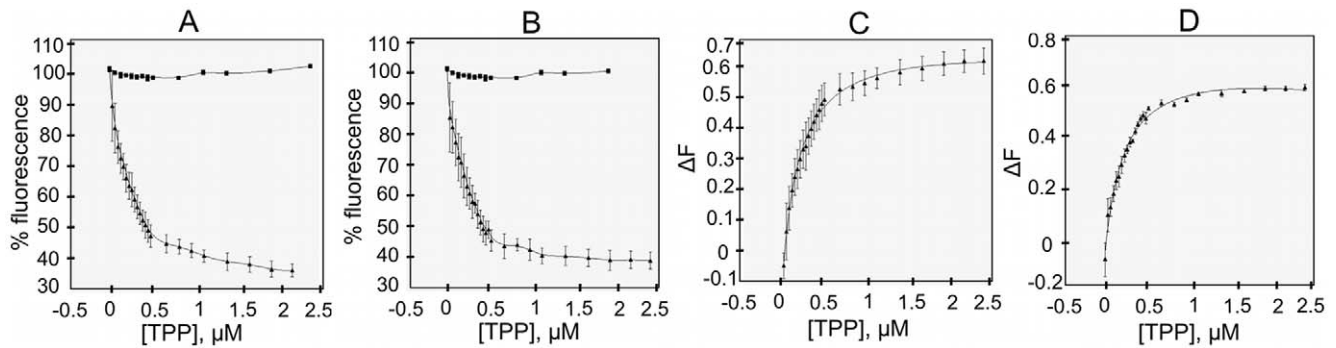

**Figure 6. Titration of Cass2 with cationic ligand.** Fluorescence quenching is plotted during tetraphenylphosphonium chloride (TPP) binding to Cass2 ( $\blacktriangle$ ) and free tryptophan ( $\blacksquare$ ) for A) wild-type and B) E134Q mutant forms of the protein. Relative fluorescence quenching ( $\Delta F$ ) values were calculated by non-linear regression plot for C) wild-type and D) mutant, leading to determination of  $K_D$  values (0.2  $\mu\text{M}$ ). Fluorescence emission was monitored at 350 nm following excitation at 295 nm (slit widths 10 and 5 nm, respectively). doi:10.1371/journal.pone.0016934.g006

## Discussion

Our experimental evidence establishes that the gene cassette *Vch\_cass2* encodes a single and independent binding domain for cationic compounds. The structure (and sequence) of its protein product **Cass2** readily confirms its homology to effector-binding domains associated with the AraC/XylS and MerR family of transcription regulators. These well-characterized factors are mediators of bacterial antibiotic and multi-drug resistance through their ability to both recognise effector molecules and to regulate transcription of the appropriate efflux system [21,25,30]. Although these multi-domain proteins usually possess similar DNA-binding domains, it is through variation of the effector-binding domain that response and binding is adapted to a range of ligand types.

The crystal structure of **Cass2** depicts PEG in a binding site organised with features reminiscent of those of the effector modules of bacterial regulators [27,29]. Our fluorescence assays confirmed **Cass2** to be particularly well adapted for tightly binding the cationic drugs which serve as ligands to the AraC/MerR family. Hydrophobic forces appear to predominate within the binding interactions, and (unlike BmrR) the **Cass2** domain is capable of binding monovalent and bivalent ligands. Within the structural framework of **Cass2**, a distinct loop feature extending from helix  $\alpha 2$  edging the central sheet (residues 41–46) is proposed to undergo structural rearrangement so as to facilitate ligand entry.

Significant sequence homologies are found between **Cass2** and genes from a group of phylogenetically-related *Vibrio* and *Shewanella* species. The crystal structure presented here therefore defines the paradigm fold for a new family of effector-binding proteins prevalent within these marine-dwelling species. Sequence variation between the two related groups of proteins is restricted to the putative hinge region (C-terminus of helix  $\alpha 2$ ) as well as strand  $\beta 4$ . Thus a slightly altered ligand accessibility may have evolved for the distinct clades outlined here.

The association of the *Vch\_cass2* gene with mobile DNA elements, also notably evident for its group of related homologs, emphasises the mechanism by which these binding modules can be laterally transferred between species. While the presence of a DNA-binding partner appears necessary for transcription regulation, we cannot rule out the possibility that the biological function of **Cass2** itself may be to provide a self-contained low-level multidrug resistance system, capable of sequestering drugs and preventing them from reaching further intracellular targets. The role of cationic drugs in treatment of cholera and inhibition of cholera toxin-internalization has been previously reported [32,33,34]. The depiction in this work of a novel effector domain capable of binding cationic compounds is therefore of immediate interest, given that these are encoded within the mobile integron gene cassette system.

We have, however, noted surface features in the **Cass2** structure consistent with a protein interaction site adjacent to the active-site cavity. We propose this to comprise a potential site for interaction of the effector-binding module with a specific DNA-binding domain, so as to mimic the organisation of the multi-domain transcription regulators. This is congruent with the more general observation that two interacting prokaryotic proteins, not necessarily encoded by neighbouring genes, may be found fused as a single chain homolog in another organism [35,36,37]. Such component proteins might be engaged in either direct physical interaction or an indirect functional association [35]. Sequence searches were conducted to locate any likely companion module(s) for **Cass2** in *V. cholerae*; no sequence homolog of the single-domain protein MarA (from *E. coli*) [38] was found amongst gene cassettes from the same environmental isolate as **Cass2**. However, wider sequence searches across published *Vibrio* genomes do reveal the existence of single-domain homologs (ZP\_01062623.1; ZP\_01976746.1) containing the helix-turn-helix motifs present in both MarA and Rob relatives.

The overall structure of the **Cass2** protein and its relationship to other members of the AraC/XylS and MerR family reinforces

**Table 1. Ligand binding affinities ( $K_D$  ( $\mu\text{M}$ )) of Cass2 and BmrR for cationic compounds.**

|                              | Cass2 <sup>a</sup> |                 | BmrR                           |                  |
|------------------------------|--------------------|-----------------|--------------------------------|------------------|
|                              | wt                 | E134Q           | wt                             | E134Q            |
| monovalent:                  |                    |                 |                                |                  |
| benzalkonium chloride        | 0.10 $\pm$ 0.50    | 0.30 $\pm$ 0.06 | -                              | -                |
| tetraphenylphosphonium (TPP) | 0.20 $\pm$ 0.08    | 0.20 $\pm$ 0.13 | 74.0 $\pm$ 20.5 <sup>b</sup> ; | 62.60 $\pm$ 3.30 |
|                              |                    |                 | 100 <sup>c</sup>               |                  |
| divalent:                    |                    |                 |                                |                  |
| chlorhexidine                | 0.20 $\pm$ 0.05    | 0.10 $\pm$ 0.02 | -                              | -                |

<sup>a</sup>tryptophan fluorescence quenching experiments (this work), 24°C, pH 7.5.

<sup>b</sup>from isothermal titration calorimetry binding assays [27].

<sup>c</sup>from equilibrium dialysis methods [23,69].

doi:10.1371/journal.pone.0016934.t001

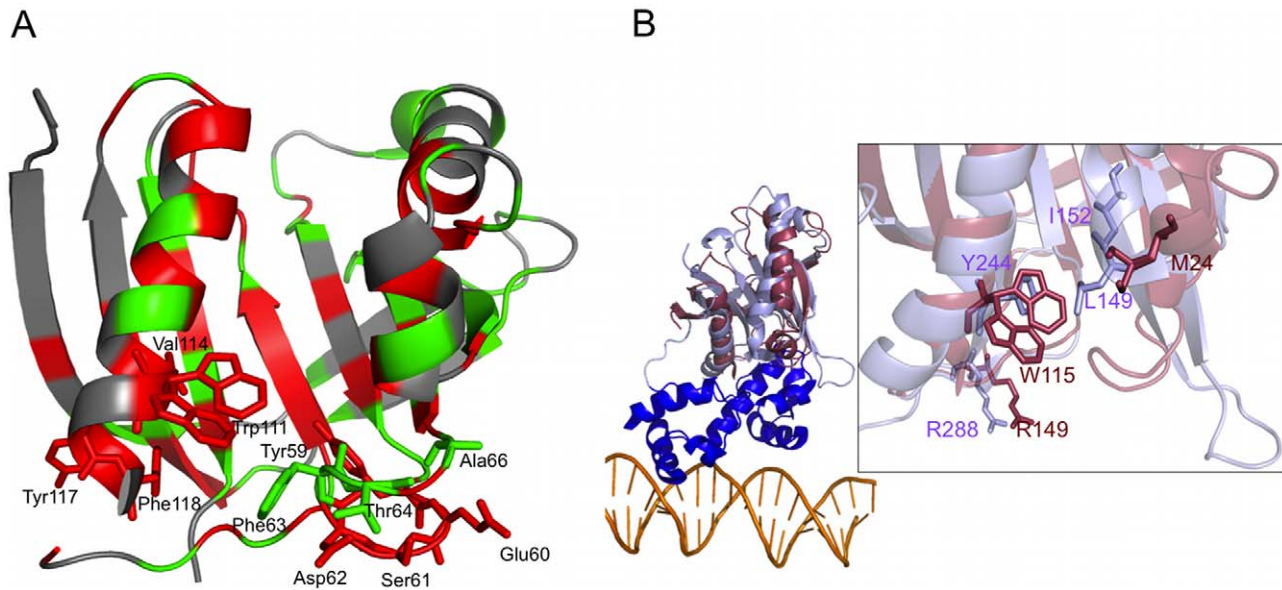

**Figure 7. Potential protein-binding interface in *Cass2*.** A) Ribbon structure of *Cass2* coloured according to sequence conservation across the *Vibrio* and *Shewanella* clades (red, fully conserved; green, homologous; see Figure 3). Conserved residues cluster in the PEG-binding cavity and a separate putative protein-binding surface. B) Features of the protein-binding surface in *Cass2* (red) overlay with those of the interface between effector-binding (purple) and DNA-binding (blue) domains of the two-domain Rob protein (PDB 1D5Y) [26]. Inset shows magnified view of domain interface of Rob and analogous key residues in *Cass2*.  
doi:10.1371/journal.pone.0016934.g007

the notion that gene cassettes within integron arrays generally move and rearrange independently of one other. Given that many cassettes encode single small domain proteins, loss of intervening *attC* site sequences may lead to permanent fusion of gene cassettes so as to instead encode a multi-domain polypeptide that confers advantage. Our recovery of an independent single domain with effector-binding capacities is significant as a possible evolutionary precursor to the multi-domain transcription regulators, of which the AraC and MerR families are examples.

Evidence for fusion events in the evolution of MerR regulators has previously been outlined [18,31]. For example, the *tipA* gene of *S. lividans* encodes single and two domain gene products. The full-length gene product (TipAL) comprises an N-terminal helix-turn-helix domain which auto-regulates the *tipA* gene in conjunction with a thiostrepton-binding domain. In vast molar excess, however, a shorter in-frame translational product (TipAS) comprising solely the drug-binding domain is independently transcribed [39,40,41]. Thus new types of transcriptional regulators are likely to evolve via gene fusion events incorporating different effector-binding domains coupled to DNA-processing modules. The depiction in this work of a novel effector domain encoded within an integron gene cassette suggests that integrons play an important role in this evolution of complex multi-domain proteins.

## Materials and Methods

### Gene Isolation

Strain OP4G of *V. cholerae* was isolated from a brackish coastal pond (Oyster Pond, Falmouth, MA, USA) as follows. Several water samples (1 ml) were spread directly agar containing on thiosulfate/citrate/bile salts/sucrose (TCBS; commonly used to isolate members of genus *Vibrio*) [42] and incubated overnight at 37°C. Isolated colonies of a yellow colour (i.e. sucrose positive) [43] were picked and re-streaked on tryptic soy broth media. After

further overnight incubation, isolated colonies were picked and re-streaked on TCBS media and again incubated overnight. This procedure was repeated twice to ensure pure cultures of the isolates, on which cassette-PCR [44] was performed to isolate integron gene cassettes, including *Vch\_cass2*.

### Protein Preparation

**Cass2** was produced recombinantly in *Escherichia coli* strain BL21-CodonPlus (DE3)-RIPL (Stratagene) with an N-terminal affinity tag (MGSSH<sub>6</sub>SSGRENLYFQG-**Cass2**) using the plasmid p15TV-L. **Cass2** was derivatized with selenomethionine (SeMet), as provided within the M9 SeMet media kit (Medicilon, Shanghai) supplemented with antibiotics (ampicillin (100 µg/ml), chloramphenicol (25 µg/ml)). Cells were grown at 37°C until OD<sub>600</sub> 1.2 and induced with 1 mM IPTG (Medicilon, Shanghai) prior to overnight growth at 25°C. Harvested cells (from 1 l culture) were frozen in Buffer A (50 mM HEPES buffer (pH 7.5), 500 mM sodium chloride, 5 mM imidazole, 5% glycerol) and sonicated in the presence of protease inhibitors (phenylmethylsulphonyl fluoride (0.5 mM) and benzamide (1 mM).

Following storage (80°C), the soluble cell fraction was loaded onto Ni-nitroloacetic affinity media (Qiagen) washed with Buffer A and eluted with Buffer A containing 250 mM imidazole. After addition of ethylenediamine tetraacetic acid (EDTA, 1 mM), purified **Cass2** was dialysed into Buffer B (10 mM HEPES buffer (pH 7.5), 500 mM sodium chloride) and concentrated to ~20 mg/ml for crystallization. The reducing reagent tris-(2-carboxyethyl)-phosphine (0.5 mM) was added to all purification buffers.

**(E134Q)Cass2** was prepared using a commercial kit (Quikchange II, Stratagene). The recombinant protein was prepared with *E. coli* BL21 (DE3) Rosetta cells (Merck) in Luria Bertani (LB) medium at 37°C. Following induction (0.2 mM IPTG) and growth at 20°C for 5 h, cells were recovered and the mutant protein isolated from the soluble fraction by batch affinity chromatography (HisTrap, GE Healthcare). Protein buffers were as above.



## Crystallization and Structure Determination

Using sitting-drop format, crystals of **Cass2** were grown to diffraction quality in 0.1 M citric acid (pH 3.50), 25% (w/v) PEG-3350. The crystals (P3<sub>2</sub>1 space group; a = 59.38 Å, b = 59.38 Å, c = 95.76 Å) were cryo-protected by immersion in paratone-N (Hampton Research) prior to flash freezing. Diffraction data was collected at 100 K using synchrotron radiation at the selenium K absorption edge (beamline 19-ID, APS, Argonne National Laboratory).

Diffraction data to 1.8 Å was processed using MOSFLM [45], SCALA [46] and CCP4 software [47]. The structure was solved by SAD using modules of the Phenix suite [48], with anomalous scattering substructure searches and density modification from the AutoSol wizard [49] identifying five Se sites. A preliminary model (88 residues, overall model-map correlation of 0.56) was built and visualized in Coot [50] and monitored throughout refinement (ADIT server) [51]. AutoBuild [52] was used for iterative model building, and the resulting model subjected to 20 macro-cycles of combined TLS, occupancy, coordinate and individual ADP refinement in phenix.refine [53]. An elongated electron density clearly visible in the Fourier difference map during the last refinement cycles was modelled using coordinates for polyethylene glycol (PEG 4000) from the HIC-Up database [54]. Data and refinement parameters are summarized in Table 2.

**Table 2.** Selected crystallographic statistics for Cass2 structure determination.

| Data collection                                                       |                     |
|-----------------------------------------------------------------------|---------------------|
| Resolution (Å) (outer shell)                                          | 1.8 (1.90 - 1.80)   |
| Unique reflections                                                    | 18598               |
| Completeness (%) (outer shell)                                        | 99.6 (99.7)         |
| I/s(I)>(outer shell)                                                  | 21 (3.6)            |
| Multiplicity                                                          | 9.9                 |
| R <sub>merge</sub> <sup>a</sup> (outer shell)                         | 0.062 (0.561)       |
| Anomalous completeness (outer shell)                                  | 99.7 (99.8)         |
| Anomalous multiplicity (outer shell)                                  | 4.8 (4.6)           |
| SAD Phasing statistics                                                |                     |
| Number of SeMet                                                       | 4                   |
| Extent of anomalous signal (Å) <sup>b</sup>                           | 2.4                 |
| Refined sites                                                         | 11                  |
| Figure of merit <sup>c</sup>                                          |                     |
| acentric, centric, overall                                            | 0.419, 0.133, 0.384 |
| Refinement statistics                                                 |                     |
| Solvent content, VS (%)                                               | 50.82               |
| R <sub>cryst</sub> /R <sub>free</sub>                                 | 0.185/0.227         |
| Reflections in R <sub>cryst</sub> /R <sub>free</sub>                  | 34832/1782          |
| Resolution range (Å)                                                  | 35.04-1.8           |
| Mean B-factor (Å <sup>2</sup> )                                       | 27.22               |
| r.m.s.d. bond lengths (Å) <sup>c</sup> , bond angles (°) <sup>d</sup> | 0.008, 1.2          |
| Ramachandran plot <sup>e</sup>                                        |                     |
| favoured (%), allowed (%), outliers                                   | 96.8, 99.4, 1       |

<sup>a</sup> $\sum_i |I_h - \bar{I}_h| / \sum_i I_h$ , where  $I_h$  is the mean intensity of reflection  $h$ ,

<sup>b</sup>According to AutoSol wizard in Phenix [49],

<sup>c</sup>According to Phaser [67] in Phenix [48] with resolution 47.88 – 1.80,

<sup>d</sup>From ADIT Validation server [51],

<sup>e</sup>From Molprobity [68].

doi:10.1371/journal.pone.0016934.t002

The structure of **Cass2** reveals one chain per asymmetric unit, with electron density visible for 153 residues, including 7 residues of the affinity tag. No density was observed for residues 120–122 (Ser-Glu-His). Residues SeMet1 (strand  $\beta$ 1), SeMet24 (helix  $\alpha$ 1) and Trp115 (helix  $\alpha$ 2) showed alternative conformations, suggestive of increased mobility within these portions of the molecule. The Ramachandran plot shows >96% of residues in most favoured regions; one outlier (Ser61; average B-factor = 50.1) occurs within an elongated loop (residues 58–66) connecting strands  $\beta$ 3 and  $\beta$ 4 of the central  $\beta$ -sheet.

## Sequence and Structure Analysis

Sequence homology searches of the non-redundant database (as at Nov, 2009) were performed using PSI-BLAST with a set threshold E-value  $<10^{-10}$  and iterated until convergence (11 rounds) [55]. A TBLASTn search was also performed against the translated nucleotide sequence database of the *Vibrio* genus. The retrieved amino acid sequences (248 in total) were subjected to a phylogenetic analysis using a suite of programs within the Mobyle web interface [56]. Multiple sequence alignments were generated using ClustalW [57] and edited using Bioedit [58] to remove gaps. The Phylip package [59] within the Mobyle portal was used to generate a distance matrix tree using Protdist and Neighbor. The confidence of nodes in amino acid analyses was estimated by 1,000 bootstrap replicates generated using SEQBOOT and compiled in a consensus tree with CONSENSE. The resulting tree was viewed with the Drawgram application. CD-Search and CDART tools of NCBI [60] were used to identify related sequence families of **Cass2** and to locate homologs within other domain organizations (as at May, 2010). DALI [61] and PDBFold (previously SSM) [62] servers were used to identify structural homologs of the crystal structure, as was the SCOP database [63].

## Binding Assays by Intrinsic Tryptophan Quenching

Fluorescence assays were used to detect binding of compounds to **Cass2** and related mutants. Concentrated ligand solutions in Buffer B were titrated into a 400  $\mu$ l sample of protein (180 nM in Buffer B) and Trp fluorescence monitored. As a control, each compound was also titrated into a 1.3  $\mu$ M sample of tryptophan (99% purity) in Buffer B, a concentration selected as yielding similar fluorescence to the initial **Cass2** sample prior to titration.

Fluorescence intensities were recorded at 22°C with a PerkinElmer LS55 fluorescence spectrophotometer using a 1 cm  $\times$  0.2 cm quartz cell. When subjected to an excitation wavelength of 295 nm, **Cass2** displayed maximum emission at  $349 \pm 1$  nm (*apo* form) and  $344 \pm 1$  nm (fully bound). Thus, fluorescence quenching was monitored by recording emission at 350 nm for all samples following excitation at 295 nm (slit widths 10 and 5 nm, respectively) with an integration time of 5 s. All readings were corrected for buffer background emission and sample dilution. Inner-filter effects were measured by titrating each compound into a 1.3  $\mu$ M sample of tryptophan in Buffer B and the relative fluorescence quenching ( $\Delta F$ ) corrected as follows [64]:

$$\Delta F = (F_0 - F_C) (F_{W0} / F_{WC}) / F_0$$
 where  $F_0$  = fluorescence intensity of protein sample,  $F_C$  = fluorescence intensity of protein with added compound,  $F_{W0}$  = fluorescence intensity of free tryptophan solution,  $F_{WC}$  = fluorescence of tryptophan solution with added compound.

Standard deviation was calculated for the individual  $\Delta F$  values from three independent experiments. For the determination of dissociation constants ( $K_D$ ) for the interactions,  $\Delta F$  was plotted against compound concentration and fitted to the following equation by non-linear regression using Kaleidagraph (Synergy software):

$\Delta F = ((\Delta F_b - \Delta F_f) [\mathbf{Cass2}]) / (K_D + [\mathbf{Cass2}]) + \Delta F_f$  where  $\Delta F$  is the relative fluorescence quenching,  $\Delta F_b$  is the maximum relative fluorescence quenching (ligand-saturated **Cass2**);  $\Delta F_f$  is the relative fluorescence quenching of unbound **Cass2**.

### Inhibition Assay

Plasmid pJAK16+*Vch\_cass2* was prepared and conjugated into *Vibrio* sp. DAT722 [16] to create strain *Vch\_cass2*+. Minimal inhibitory concentration (MIC) assays were conducted with the cationic agents in 96-well plate format using a broth micro-dilution technique [65]. *Vch\_cass2*+ and *Vch\_cass2*- (control strain: *Vibrio* sp. DAT722+pJAK16 plasmid without *Vch\_cass2* gene) were grown overnight (37°C) in LB/salt medium. Subcultures (1/100, 1/20 dilutions) were grown at 37°C until OD<sub>600</sub> value 0.6. Wells were inoculated with 10 µl subculture following further dilution (1/100 in LB/salt medium), and growth monitored by recording OD<sub>595</sub> after 16 h.

### References

- Boucher Y, Stokes HW (2006) The roles of lateral gene transfer and vertical descent in vibrio evolution. In: Fabiano Lopes Thompson BA, JGSwings, eds. The biology of vibrios. Washington DC: ASM Press. pp 84–94.
- Chun J, Grim CJ, Hasan NA, Lee JH, Choi SY, et al. (2009) Comparative genomics reveals mechanism for short-term and long-term clonal transitions in pandemic *Vibrio cholerae*. Proc Natl Acad Sci U S A 106: 15442–15447.
- Ramamurthy T, Yamasaki S, Takeda Y, Nair GB (2003) *Vibrio cholerae* O139 Bengal: odyssey of a fortuitous variant. Microbes Infect 5: 329–344.
- Faruque SM, Kamruzzaman M, Meraj IM, Chowdhury N, Nair GB, et al. (2003) Pathogenic potential of environmental *Vibrio cholerae* strains carrying genetic variants of the toxin-coregulated pilus pathogenicity island. Infect Immun 71: 1020–1025.
- Chakraborty S, Mukhopadhyay AK, Bhadra RK, Ghosh AN, Mitra R, et al. (2000) Virulence genes in environmental strains of *Vibrio cholerae*. Appl Environ Microbiol 66: 4022–4028.
- Labbate M, Boucher Y, Joss MJ, Michael CA, Gillings MR, et al. (2007) Use of chromosomal integron arrays as a phylogenetic typing system for *Vibrio cholerae* pandemic strains. Microbiology 153: 1488–1498.
- Mazel D (2006) Integrons: agents of bacterial evolution. Nat Rev Microbiol 4: 608–620.
- Rowe-Magnus DA, Guerout AM, Biskri L, Bouige P, Mazel D (2003) Comparative analysis of superintegrons: engineering extensive genetic diversity in the *Vibrionaceae*. Genome Res 13: 428–442.
- Thompson FL, Iida T, Swings J (2004) Biodiversity of vibrios. Microbiol Mol Biol Rev 68: 403–431. table of contents.
- Faruque SM, Mekalanos JJ (2003) Pathogenicity islands and phages in *Vibrio cholerae* evolution. Trends Microbiol 11: 505–510.
- Hall RM, Collis CM (1998) Antibiotic resistance in gram-negative bacteria: the role of gene cassettes and integrons. Drug Resist Updat 1: 109–119.
- Stokes HW, O’Gorman DB, Recchia GD, Parsekian M, Hall RM (1997) Structure and function of 59-base element recombination sites associated with mobile gene cassettes. Mol Microbiol 26: 731–745.
- Collis CM, Grammaticopoulos G, Briton J, Stokes HW, Hall RM (1993) Site-specific insertion of gene cassettes into integrons. Mol Microbiol 9: 41–52.
- Labbate M, Case RJ, Stokes HW (2009) The Integron/Gene Cassette System: An Active Player in Bacterial Adaptation. In: MBGogarten JPG, LCOlendzenski, eds. Horizontal Gene Transfer: Genomes in Flux. pp 103–125.
- Boucher Y, Labbate M, Koenig JE, Stokes HW (2007) Integrons: mobilizable platforms that promote genetic diversity in bacteria. Trends Microbiol 15: 301–309.
- Boucher Y, Nesbo CL, Joss MJ, Robinson A, Mabbutt BC, et al. (2006) Recovery and evolutionary analysis of complete integron gene cassette arrays from *Vibrio*. BMC Evol Biol 6: 3.
- Elsaid H, Stokes HW, Nakamura T, Kitamura K, Fuse H, et al. (2007) Novel and diverse integron integrase genes and integron-like gene cassettes are prevalent in deep-sea hydrothermal vents. Environ Microbiol 9: 2298–2312.
- Koenig JE, Boucher Y, Charlebois RL, Nesbo C, Zhaxybayeva O, et al. (2008) Integron-associated gene cassettes in Halifax Harbour: assessment of a mobile gene pool in marine sediments. Environ Microbiol 10: 1024–1038.
- Martin RG, Rosner JL (2001) The AraC transcriptional activators. Curr Opin Microbiol 4: 132–137.
- Brown NL, Stoyanov JV, Kidd SP, Hobman JL (2003) The MerR family of transcriptional regulators. FEMS Microbiol Rev 27: 145–163.
- Gallegos MT, Schleif R, Bairoch A, Hofmann K, Ramos JL (1997) AraC/XylS family of transcriptional regulators. Microbiol Mol Biol Rev 61: 393–410.
- Schumacher MA, Brennan RG (2002) Structural mechanisms of multidrug recognition and regulation by bacterial multidrug transcription factors. Mol Microbiol 45: 885–893.

### PDB Accession Number

Coordinates and structure factors for **Cass2** are deposited as PDB file 3GK6.

### Acknowledgments

We thank Aled Edwards and Andrzej Joachimiak for encouraging and supporting this collaboration with the Midwest Center for Structural Genomics. We also thank Louise Brown and Neil Wilson for helpful discussions during manuscript preparation.

### Author Contributions

Conceived and designed the experiments: CND YB KAH AS ITP HWS BCM. Performed the experiments: CND YB KAH RDL CC ML. Analyzed the data: CND BCM SJH KAH ITP PMGC. Contributed reagents/materials/analysis tools: YB AS ITP HWS PMGC BCM. Wrote the paper: CND ITP PMGC BCM. Technical support: SJH XX HC. Conceptual advice: KAH AS ITP HWS PMGC BCM.

- Ahmed M, Borsch CM, Taylor SS, Vazquez-Laslop N, Neyfakh AA (1994) A protein that activates expression of a multidrug efflux transporter upon binding the transporter substrates. J Biol Chem 269: 28506–28513.
- Letunic I, Doerks T, Bork P (2009) SMART 6: recent updates and new developments. Nucleic Acids Res 37: D229–232.
- Egan SM (2002) Growing repertoire of AraC/XylS activators. J Bacteriol 184: 5529–5532.
- Kwon HJ, Bennik MH, Demple B, Ellenberger T (2000) Crystal structure of the *Escherichia coli* Rob transcription factor in complex with DNA. Nat Struct Biol 7: 424–430.
- Newberry KJ, Huffman JL, Miller MC, Vazquez-Laslop N, Neyfakh AA, et al. (2008) Structures of BmrR-drug complexes reveal a rigid multidrug binding pocket and transcription activation through tyrosine expulsion. J Biol Chem 283: 26795–26804.
- Romanowski MJ, Gibney SA, Burley SK (2002) Crystal structure of the *Escherichia coli* SbmC protein that protects cells from the DNA replication inhibitor microcin B17. Proteins 47: 403–407.
- Zheleznova EE, Markham PN, Neyfakh AA, Brennan RG (1999) Structural basis of multidrug recognition by BmrR, a transcription activator of a multidrug transporter. Cell 96: 353–362.
- Grkovic S, Brown MH, Skurray RA (2002) Regulation of bacterial drug export systems. Microbiol Mol Biol Rev 66: 671–701. table of contents.
- Heldwein EE, Brennan RG (2001) Crystal structure of the transcription activator BmrR bound to DNA and a drug. Nature 409: 378–382.
- Dutta NK, Marker PH, Rao NR (1972) Berberine in toxin-induced experimental cholera. Br J Pharmacol 44: 153–159.
- Islam MR, Sack DA, Holmgren J, Bardhan PK, Rabbani GH (1982) The use of chlorpromazine in the treatment of cholera and other severe acute watery diarrheal diseases. Gastroenterology 82: 1335–1340.
- Sofer A, Futerman AH (1995) Cationic amphiphilic drugs inhibit the internalization of cholera toxin to the Golgi apparatus and the subsequent elevation of cyclic AMP. J Biol Chem 270: 12117–12122.
- Enright AJ, Iliopoulos I, Kyrpides NC, Ouzounis CA (1999) Protein interaction maps for complete genomes based on gene fusion events. Nature 402: 86–90.
- Marcotte EM, Pellegrini M, Ng HL, Rice DW, Yeates TO, et al. (1999) Detecting protein function and protein-protein interactions from genome sequences. Science 285: 751–753.
- Yanai I, Derti A, DeLisi C (2001) Genes linked by fusion events are generally of the same functional category: a systematic analysis of 30 microbial genomes. Proc Natl Acad Sci U S A 98: 7940–7945.
- Rhee S, Martin RG, Rosner JL, Davies DR (1998) A novel DNA-binding motif in MarA: the first structure for an AraC family transcriptional activator. Proc Natl Acad Sci U S A 95: 10413–10418.
- Chiu ML, Viollier PH, Katoh T, Ramsden JJ, Thompson CJ (2001) Ligand-induced changes in the *Streptomyces lividans* TipAL protein imply an alternative mechanism of transcriptional activation for MerR-like proteins. Biochemistry 40: 12950–12958.
- Kahmann JD, Sass HJ, Allan MG, Seto H, Thompson CJ, et al. (2003) Structural basis for antibiotic recognition by the TipA class of multidrug-resistance transcriptional regulators. Embo J 22: 1824–1834.
- Chiu ML, Folcher M, Katoh T, Puglia AM, Vohradsky J, et al. (1999) Broad spectrum thiopeptide recognition specificity of the *Streptomyces lividans* TipAL protein and its role in regulating gene expression. J Biol Chem 274: 20578–20586.
- Kobayashi T, Enomoto S, Sakazaki R, Kuwahara S (1963) [a New Selective Isolation Medium for the *Vibrio* Group; on a Modified Nakanishi’s Medium (Tcbs Agar Medium)]. Nippon Saikungaku Zasshi 18: 387–392.

43. West PA, Russek E, Brayton PR, Colwell RR (1982) Statistical evaluation of a quality control method for isolation of pathogenic *Vibrio* species on selected thiosulfate-citrate-bile salts-sucrose agars. *J Clin Microbiol* 16: 1110–1116.
44. Stokes HW, Holmes AJ, Nield BS, Holley MP, Nevalainen KM, et al. (2001) Gene cassette PCR: sequence-independent recovery of entire genes from environmental DNA. *Appl Environ Microbiol* 67: 5240–5246.
45. Leslie AG (2006) The integration of macromolecular diffraction data. *Acta Crystallogr D Biol Crystallogr* 62: 48–57.
46. Evans PR ( ) Scaling of MAD data. In: Wilson KS, Davies G, Ashton AW, Bailey S, eds. 1997; Warrington: CCLRC, Daresbury Laboratory, 97–102.
47. Collaborative Computational Project Number 4 (1994) The CCP4 suite: programs for protein crystallography. *Acta crystallographica D*50: 760–763.
48. Adams PD, Grosse-Kunstleve RW, Hung LW, Ioerger TR, McCoy AJ, et al. (2002) PHENIX: building new software for automated crystallographic structure determination. *Acta Crystallogr D Biol Crystallogr* 58: 1948–1954.
49. Terwilliger TC, Adams PD, Read RJ, McCoy AJ, Moriarty NW, et al. (2009) Decision-making in structure solution using Bayesian estimates of map quality: the PHENIX AutoSol wizard. *Acta Crystallogr D Biol Crystallogr* 65: 582–601.
50. Emsley P, Cowtan K (2004) Coot: model-building tools for molecular graphics. *Acta Crystallogr D Biol Crystallogr* 60: 2126–2132.
51. Westbrook J, Feng Z, Burkhardt K, Berman HM (2003) Validation of protein structures for protein data bank. *Methods Enzymol* 374: 370–385.
52. Terwilliger TC, Grosse-Kunstleve RW, Afonine PV, Moriarty NW, Zwart PH, et al. (2008) Iterative model building, structure refinement and density modification with the PHENIX AutoBuild wizard. *Acta Crystallogr D Biol Crystallogr* 64: 61–69.
53. Afonine PV, Grosse-Kunstleve RW, Adams PD (2005b) The Phenix refinement framework. *CCP4 Newsletter* 42, contribution 8.
54. Kleywegt GJ (2007) Crystallographic refinement of ligand complexes. *Acta Crystallogr D Biol Crystallogr* 63: 94–100.
55. Altschul SF, Madden TL, Schaffer AA, Zhang J, Zhang Z, et al. (1997) Gapped BLAST and PSI-BLAST: a new generation of protein database search programs. *Nucleic Acids Res* 25: 3389–3402.
56. Neron B, Menager H, Maufrais C, Joly N, Maupetit J, et al. (2009) Mobylye: a new full web bioinformatics framework. *Bioinformatics* 25: 3005–3011.
57. Thompson JD, Higgins DG, Gibson TJ (1994) CLUSTAL W: improving the sensitivity of progressive multiple sequence alignment through sequence weighting, position-specific gap penalties and weight matrix choice. *Nucleic Acids Res* 22: 4673–4680.
58. Hall TA (1999) BioEdit: a user-friendly biological sequence alignment editor and analysis program for Windows 95/98/NT. *Nucl Acids Symp Ser* 41: 95–98.
59. Felsenstein J (1989) PHYLIP—Phylogeny Inference Package (Version 3.2). *Cladistics* 5: 164–166.
60. Sayers EW, Barrett T, Benson DA, Bryant SH, Canese K, et al. (2009) Database resources of the National Center for Biotechnology Information. *Nucleic Acids Res* 37: D5–15.
61. Holm L, Sander C (1995) Dali: a network tool for protein structure comparison. *Trends Biochem Sci* 20: 478–480.
62. Krissinel E, Henrick K (2004) Secondary-structure matching (SSM), a new tool for fast protein structure alignment in three dimensions. *Acta Crystallogr D Biol Crystallogr* 60: 2256–2268.
63. Murzin AG, Brenner SE, Hubbard T, Chothia C (1995) SCOP: a structural classification of proteins database for the investigation of sequences and structures. *J Mol Biol* 247: 536–540.
64. Vazquez-Laslop N, Markham PN, Neyfakh AA (1999) Mechanism of ligand recognition by BmrR, the multidrug-responding transcriptional regulator: mutational analysis of the ligand-binding site. *Biochemistry* 38: 16925–16931.
65. Wiegand I, Hilpert K, Hancock RE (2008) Agar and broth dilution methods to determine the minimal inhibitory concentration (MIC) of antimicrobial substances. *Nat Protoc* 3: 163–175.
66. Newberry KJ, Brennan RG (2004) The structural mechanism for transcription activation by MerR family member multidrug transporter activation, N terminus. *J Biol Chem* 279: 20356–20362.
67. McCoy AJ, Storoni LC, Read RJ (2004) Simple algorithm for a maximum-likelihood SAD function. *Acta Crystallogr D Biol Crystallogr* 60: 1220–1228.
68. Davis IW, Leaver-Fay A, Chen VB, Block JN, Kapral GJ, et al. (2007) MolProbity: all-atom contacts and structure validation for proteins and nucleic acids. *Nucleic Acids Res* 35: W375–383.
69. Markham PN, Ahmed M, Neyfakh AA (1996) The drug-binding activity of the multidrug-responding transcriptional regulator BmrR resides in its C-terminal domain. *J Bacteriol* 178: 1473–1475.
